# Supplementary material for: A DNA-binding Gd chelate for the detection of cell death by MRI
Source: Royal Society of Chemistry journal article supplement (doi:10.1039/b907375b), 2009-01-01
Supplement: b907375b.pdf [file b907375b.pdf]

## A DNA-binding Gd chelate for the detection of cell death by MRI

Elisabeth Garanger, Scott Hildebrand, Joseph T. Blois, David E. Sosnovik, Ralph Weissleder, and Lee Josephson\*

Center for Molecular Imaging Research, Massachusetts General Hospital, Harvard Medical School, Charlestown MA

RECEIVED DATE (automatically inserted by publisher); [ljosephson@mg.harvard.edu](mailto:ljosephson@mg.harvard.edu)

### Supplementary Information.

#### Experimental Procedure.

##### Synthesis of GadoTO.

**2**: In a sealed tube, 1'-(3'-iodopropyl)-3-methyl-oxa-4'-cyanine iodide **1**<sup>1,2</sup> (200 mg, 341.1  $\mu\text{mol}$ ) was suspended and dissolved into 10 mL anhydrous ethanol. A solution of ethyl *N,N*-dimethyl-6-aminohexanoate (320 mg, 1.709 mmol, 5 equiv.) in 2 mL anhydrous ethanol was added. The reaction mixture was stirred overnight at 145°C. The dark purple solution was cooled down to room temperature. The precipitate formed was separated by filtration, washed with ether and dried under vacuum. The purple solid powder was dissolved in 8 mL of a mixture of acetonitrile/water (50:50). A solution of NaOH 1M (4 mL) was added. The reaction mixture was stirred at room temperature for 1 h and purified by RP-HPLC (UV monitoring at 500 nm, 0-100% eluant B in 30 min gradient, eluant A: 0.1% TFA, eluant B: 0.1% TFA, 90% acetonitrile, 21 mL.min<sup>-1</sup> flow rate). The fraction collected ( $t_R=13$  min) was lyophilized. Compound **2** was obtained as an orange solid powder (94.5 mg, 156.5  $\mu\text{mol}$ , 45.9% yield). (C<sub>29</sub>H<sub>36</sub>N<sub>3</sub>O<sub>2</sub>S<sup>+</sup>, CF<sub>3</sub>CO<sub>2</sub><sup>-</sup>). Calc. exact mass: 490.25+112.99; found m/z: [M+H]<sup>2+</sup>=245.7. <sup>1</sup>H NMR (400 MHz, DMSO-d<sub>6</sub>,  $\delta$  ppm): 1.28 (quintet, 2H, J=8 Hz); 1.56 (quintet, 2H, J=8Hz); 1.69 (m, 2H); 2.30 (m, 4H); 3.05 (s, 6H); 3.29 (m, 2H); 3.50 (m, 2H); 4.07 (s, 3H); 4.65 (t, 2H, J=8 Hz); 7.0 (s, 1H); 7.41 (d, 1H, J=8 Hz); 7.46 (t, 1H, J=8 Hz); 7.65 (t, 1H, J=8 Hz); 7.79 (t, 1H, J=8 Hz); 7.84 (d, 1H, J=8 Hz); 8.03 (t, 1H, J=8 Hz); 8.10 (d, 1H, J=8 Hz); 8.22 (d, 1H, J=8 Hz); 8.65 (d, 1H, J=8 Hz); 8.85 (d, 1H, J=8 Hz).

**3**: Compound **2** (94.5 mg, 156.5  $\mu\text{mol}$ ) was dissolved in 1.3 mL anhydrous DMF. Anhydrous DIPEA (70  $\mu\text{L}$ , 401.9  $\mu\text{mol}$ , 2.6 equiv.) and di(*N*-succinimidyl) carbonate (101.2 mg, 395.1  $\mu\text{mol}$ , 2.5 equiv.) were added. The reaction mixture was stirred at room temperature for 1 h. Precipitation from ether afforded the succinimidyl ester intermediate as a red solid. In a polypropylene vial, *p*-NH<sub>2</sub>-Bn-DTPA (70.4 mg, 141.2  $\mu\text{mol}$ ) was dissolved in 706  $\mu\text{L}$  anhydrous DMF containing DIPEA (295  $\mu\text{L}$ , 1.694 mmol, 12.0 equiv.). A solution the succinimidyl ester intermediate (78.3  $\mu\text{mol}$ , 0.55 equiv.) in 330  $\mu\text{L}$  anhydrous DMF was added. The reaction mixture was stirred overnight at 60°C and purified by RP-HPLC (UV monitoring at 500 nm; 0-50% eluant B in 30 min gradient; eluant A: ammonium acetate buffer (50 mM); eluant B: acetonitrile; 21 mL.min<sup>-1</sup> flow rate). The fraction collected ( $t_R=15$  min) was lyophilized. Compound **3** was obtained as a red solid (31.4 mg, 32.4  $\mu\text{mol}$ , 20.7% yield). (C<sub>50</sub>H<sub>63</sub>N<sub>7</sub>O<sub>11</sub>S). Calc. exact mass: 969.43; found m/z: [M+2H]<sup>2+</sup>=486.0, [M+3H]<sup>3+</sup>=324.2.

**4**: Compound **3** (23.8 mg, 24.5  $\mu\text{mol}$ ) was dissolved in 900  $\mu\text{L}$  of a solution of citric acid 0.1 M pH 5.7. GdCl<sub>3</sub>·6H<sub>2</sub>O (37.0 mg, 99.5  $\mu\text{mol}$ , 4.1 equiv.) dissolved in 1.8 mL citric acid 0.1 M pH 5.7 was added. The reaction mixture was stirred for 2 h at room temperature and purified by RP-HPLC (UV monitoring at 500 nm; 0-50% eluant B in 30 min gradient; eluant A: ammonium acetate buffer 50 mM; eluant B: acetonitrile; 21 mL.min<sup>-1</sup> flow rate). The fraction collected ( $t_R=17$  min) was lyophilized. Compound **4** (GadoTO) (27.2 mg, 24.2  $\mu\text{mol}$ , quant. yield) was obtained as an orange solid powder. (C<sub>50</sub>H<sub>60</sub>GdN<sub>7</sub>O<sub>11</sub>S). Calc. exact mass: 1124.33; found m/z: [M+2H]<sup>2+</sup>=563.5.

##### Relaxation Time Measurements.

Relaxation times were measured at 0.47 T and 40°C using a Bruker Minispec mq20 (Bruker Optics Inc., Woodlands, TX). For T<sub>1</sub> relaxation times, an inversion-recovery sequence was used, which consisted of 12 data points with pulse separations ranging from 5 to 1000 ms and 4 scans each. For T<sub>2</sub> relaxation times, a spin-echo pulse sequence was used, which consisted of 200 data points with a pulse separation of 0.5 ms and 8 scans. Five independent measurements of T<sub>1</sub> and T<sub>2</sub> were recorded.

*Preparation of plasmid DNA.* Plasmid DNA (6.4 kb total size) was obtained from DH10B E. Coli cells cultured overnight in the presence of ampicillin (100 µg/ml; Mediatech Inc, Manassas, VA) using a Plasmid Maxi preparation kit (Qiagen). The resulting plasmid DNA was quantified by gel electrophoresis.

*Determination of the relaxivities of GadoTO.*

Solutions of the GadoTO conjugate **4** (concentration range from 0.05 to 2 mM) were prepared in ultrapure water in the presence or in the absence of plasmid DNA at 0.25 µg/µL ([Deoxyribonucleotide]=0.77 mM, assuming an average MW per deoxyribonucleotide of 325 g.mol<sup>-1</sup>). The solutions were transferred into capillary tubes and T<sub>1</sub> and T<sub>2</sub> measured on the Minispec. Molar relaxivities were the slopes of the plots of 1/T<sub>i</sub> (i=1,2) versus GadoTO **4** concentrations. R<sub>1</sub> and R<sub>2</sub> were obtained by a linear least-squares fit of the data, with coefficients of correlation greater than 0.99 obtained in all cases. Values are the mean and standard deviation of five independent T<sub>i</sub> measurements. Molar relaxivities R<sub>1</sub> and R<sub>2</sub> of Gd-DTPA (Schering, Berlin) in ultrapure water were determined similarly.

*Relaxation assay of GadoTO interacting with DNA.*

GadoTO **4** at 1 mM was employed with increasing concentrations of plasmid DNA (DNA 0.025 to 0.3 µg/µL). Relaxation times measured on the Minispec as above. T<sub>1</sub> values were fit to a non-linear sigmoidal dose-response regression, GraphPad Prism) to determine the half-maximal concentration (EC<sub>50</sub>=0.089 mM, 95% confidence interval 0.078-0.101)

*Fluorescence assay of GadoTO interacting with DNA.*

GadoTO at 2.35 µM was employed with increasing concentrations of DNA. Absorption spectra were measured on a Varian Cary 50 Bio UV-Visible spectrophotometer. The absorbance at 511 nm was measured. Fluorescence emission spectra were recorded on a Varian Cary Eclipse fluorescence spectrophotometer. Fluorescence intensities were measured between 510 and 700 nm and corrected, when necessary, for matched absorbances at 511 nm. Fluorescence intensities were plotted versus DNA concentrations. Fluorescence values were fit to a non-linear sigmoidal dose-response regression (GraphPad Prism) to determine the half-maximal concentration (EC<sub>50</sub>=0.179 mM, 95% confidence interval 0.149-0.214).

*Cell culture.*

All experiments described used Jurkat T cells (Clone E6-1, ATCC #TIB-152). Cells were grown in RPMI 1640 medium (ThermoFisher Scientific, Hampton, NH) with 10 % fetal bovine serum (Valley Biomedical, Winchester, VA), 1% L-Glutamine (Mediatech, Manassas, VA), 1% Penicillin-Streptomycin (Mediatech, Manassas, VA). Media was changed every two or three days. Cells were maintained at 37°C, 5% CO<sub>2</sub>.

*Flow cytometry experiments.*

Cells were treated with camptothecin (CPT, 24 hrs, 10 µM). After removal of the medium, cells were resuspended into 100 µL of binding buffer (10 mM HEPES, 140 mM NaCl, 2.5 mM CaCl<sub>2</sub>, 1% FBS). Cells were stained at 37°C for 15 min with 1 µL Annexin-APC (Invitrogen) and 1 µL propidium iodide (BD Pharmingen) or 1 µL of GadoTO (0.1 mM stock solution in binding buffer). Cells were diluted with 200 µL of binding buffer and analyzed by flow cytometry (FACSCalibur, Becton Dickinson). Fluorescence from the APC fluorochrome was measured in FL4, PI in FL3, and GadoTO in FL1.

*Fluorescence microscopy.*

Cells were treated (10 µM CPT, 24 h) and, after removal of the medium, resuspended in 200 µL of binding buffer. Cells were stained at 37°C for 15 min with 4 µL Hoescht 33342 (Invitrogen, stock solution diluted to 10 µg.mL<sup>-1</sup> in binding buffer) and 1 µL of GadoTO (0.1 mM stock solution in binding buffer). The cell suspension (50 µL) was placed on a microscope slide covered with a coverslip imaged immediately at 40x on a Nikon Eclipse 80i equipped with a Cascade Photometrics (512B) camera.

*Relaxation assay for cell uptake of GadoTO.*

On day 0, cells were seeded at identical and high density into two T75 culture flasks. Cells were cultured for 24 hrs in the absence or in the presence of 10 µM CPT. On day 1, the culture of each flask was numbered with trypan blue and evenly distributed into three assay tubes. The medium was removed and replaced by 100 µL of binding buffer containing either no Gd, 5 mM GadoTO or 5 mM Gd-DTPA. Cells were incubated (45 min, 37°C) and rinsed once with 3 mL binding buffer. Cells were lysed with 60 µL of 1% Triton X-100 with relaxation times measured as above.

*Magnetic Resonance Imaging (MRI).*

Cells were treated (10  $\mu$ M CPT, 24 h), washed with media, and incubated (1h, 37°C) with the Gd complexes in binding buffer. Cells were rinsed twice with 3 mL binding buffer and resuspended with liquid Matrigel (BD Biosciences, Bedford, MA) at 4°C. Matrigel solutions were transferred into capillary tubes and allowed to solidify according to manufacturer's instructions. The tubes were immersed in a 50-mL Falcon tube filled with tap water and imaged on a 9.4-T horizontal bore scanner (Biospec, Bruker, Billerica, MA) equipped with a 1500 mT/m gradient (Resonance Research, Billerica MA). Gradient echo images were acquired with the following parameters: FOV=3 cm, slice thickness 1 mm, matrix 128 x 128, TR 50ms, flip angle 80 degrees, TE= 1.4 ms, and signal averages = 4.

*Fluorescence Reflectance Imaging (FRI).*

Capillary tubes prepared as described above for MRI were imaged with a 12-bit CCD camera (Kodak, Rochester, NY) equipped with FITC filters, suitable for the detection of TO.

(1) Brooker, L. G. S.; Keyes, G. H.; Williams, W. W. *J Am Chem Soc* **1942**, *64*, 199-210.

(2) Nygren, J.; Svanvik, N.; Kubista, M. *Biopolymers* **1998**, *46*, 39-51.

**LC-MS of intermediate 2.**

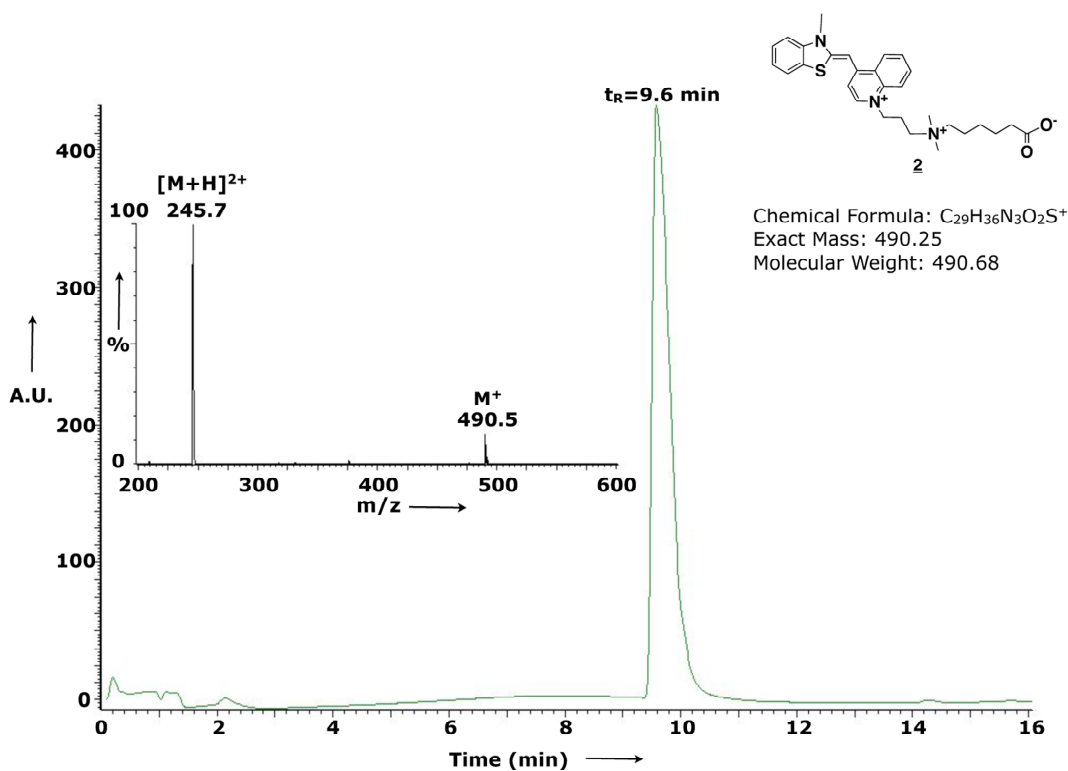

LC-MS of intermediate **3**.

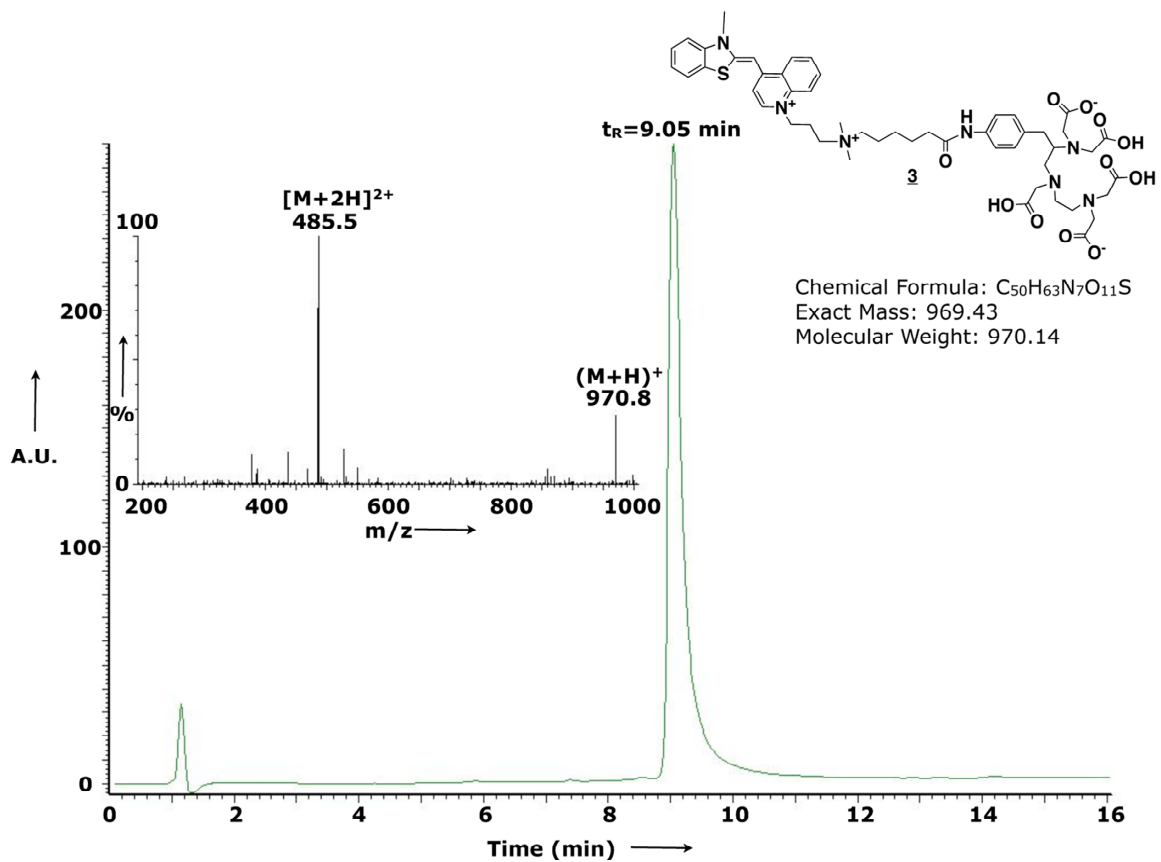

Determination of molar relaxivities of GadoTO and Gd-DTPA.

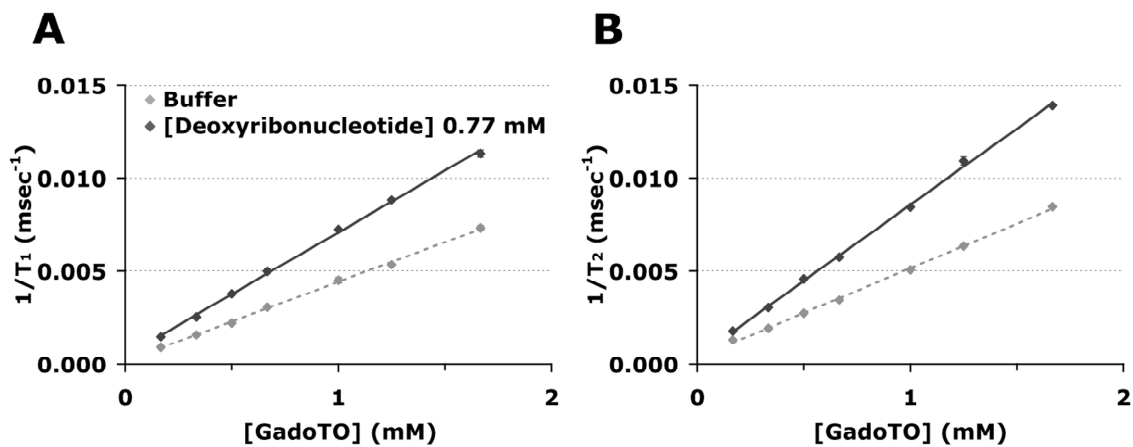

|                   |                                              | $R_1$<br>( $\text{mM}^{-1} \cdot \text{msec}^{-1}$ ) | $R_2$<br>( $\text{mM}^{-1} \cdot \text{msec}^{-1}$ ) |
|-------------------|----------------------------------------------|------------------------------------------------------|------------------------------------------------------|
| <b>GadoTO</b>     | <b>Buffer</b>                                | $(4.23 \pm 0.06) \cdot 10^{-3}$<br>( $r^2=0.999$ )   | $(4.80 \pm 0.08) \cdot 10^{-3}$<br>( $r^2=0.999$ )   |
|                   | <b>DNA</b><br>([Deoxyribonucleotide]=0.77mM) | $(6.5 \pm 0.2) \cdot 10^{-3}$<br>( $r^2=0.996$ )     | $(8.2 \pm 0.1) \cdot 10^{-3}$<br>( $r^2=0.998$ )     |
| <b>Magnevist®</b> | <b>Buffer</b>                                | $(3.96 \pm 0.02) \cdot 10^{-3}$<br>( $r^2=0.999$ )   | $(4.35 \pm 0.03) \cdot 10^{-3}$<br>( $r^2=0.999$ )   |

(0.47 T, 40°C)
